# Supplementary material for: One-Step Low Temperature Synthesis of CeO2 Nanoparticles Stabilized by Carboxymethylcellulose
Source: MDPI journal article supplement (doi:10.3390/polym15061437), 2023-03-14
Supplement: s1 [file s1]

## Supplementary materials

For

# One-Step Low Temperature Synthesis of CeO<sub>2</sub> Nanoparticles Stabilized by Carboxymethylcellulose

Vasily V. Spiridonov <sup>1,\*</sup>, Andrey V. Sybachin <sup>1</sup>, Vladislava A. Pigareva <sup>1</sup>, Mikhail I. Afanasov <sup>1</sup>, Sharifjon A. Musoev <sup>2</sup>, Alexander V. Knotko <sup>2</sup> and Sergey B. Zezin <sup>1</sup>

<sup>1</sup> Department of Chemistry, Lomonosov Moscow State University, Leninskie Gory 1-3, 119991 Moscow, Russia

<sup>2</sup> Faculty of Materials Science, Lomonosov Moscow State University, Leninskie Gory 1-73, 119991 Moscow, Russia

### *Experimental*

UV spectroscopy.

The determination of the cerium content in the composites was carried out using the UV spectroscopy method. The measurements were carried out on a Specord M40 device from Carl Zeiss (Jena, Germany) in the spectral range from 280 to 500 nm. Sample solutions were prepared to record UV spectra. A calibration graph was built according to the method given in [Bumajdad, A.; Eastoe, J.; Mathew, A. Cerium oxide nanoparticles prepared in self-assembled systems. *Adv. Colloid Interface Sci.* **2009**, 147-148, 56–66]. To construct this calibration graph, weighings of cerium ammonium nitrate 0.5 mg, 1 mg, 1.5 mg and 2 mg were dissolved in 100 µl of concentrated H<sub>2</sub>SO<sub>4</sub>. Then was added 10 ml of an aqueous solution containing 0.1% wt. silver nitrate and 0.2 g ammonium persulfate. After that, the UV spectra of the obtained solutions were recorded in the wavelength range from 200 to 500 nm and the absorption intensity was measured at a wavelength of 310 nm,  $D_{\lambda=310 \text{ nm}}$ . Absorption spectra of solutions containing cerium ions of various concentrations and a calibration plot (dependence against the concentration of cerium ions, mg/ml) are presented in Figure S1.

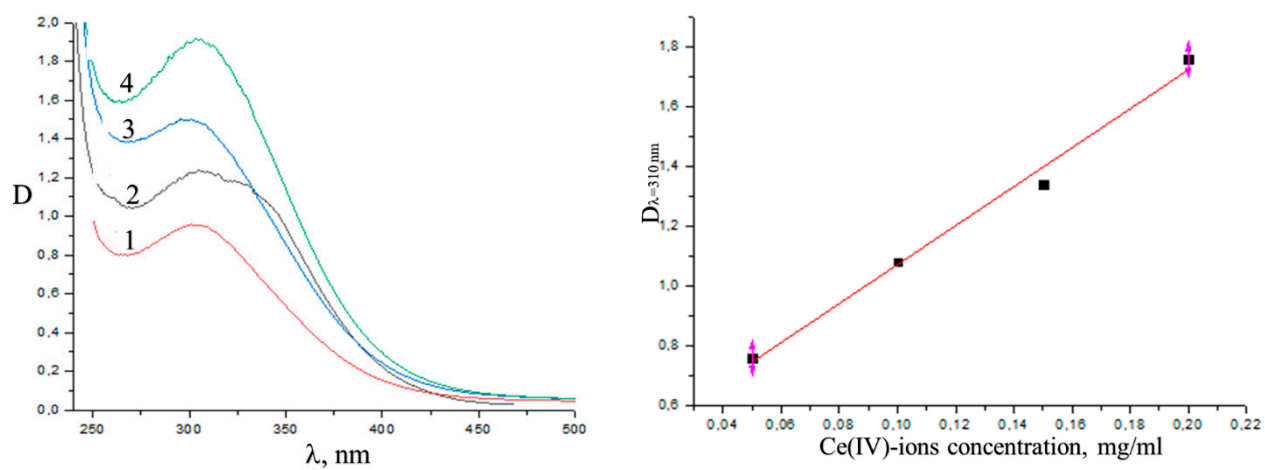

a)

b)

**Figure S1.** UV spectra of  $(\text{NH}_4)_2\text{Ce}(\text{NO}_3)_6$  solutions of various concentrations (a): 0.05 mg/ml (1); 0.1 mg/ml (2); 0.15 mg/ml (3); 0.2 mg/ml (4). Calibration plot of absorbance of  $(\text{NH}_4)_2\text{Ce}(\text{NO}_3)_6$  solutions versus concentration at 310 nm (b).

TEM imaging.

TEM images of  $\text{CeO}_2/\text{CMC}$  nanocomposites with different content of nanoparticles are presented on Figure S2.

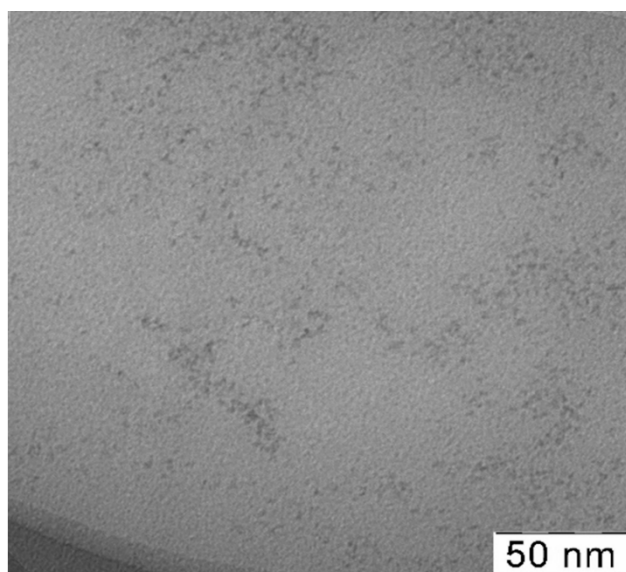

a)

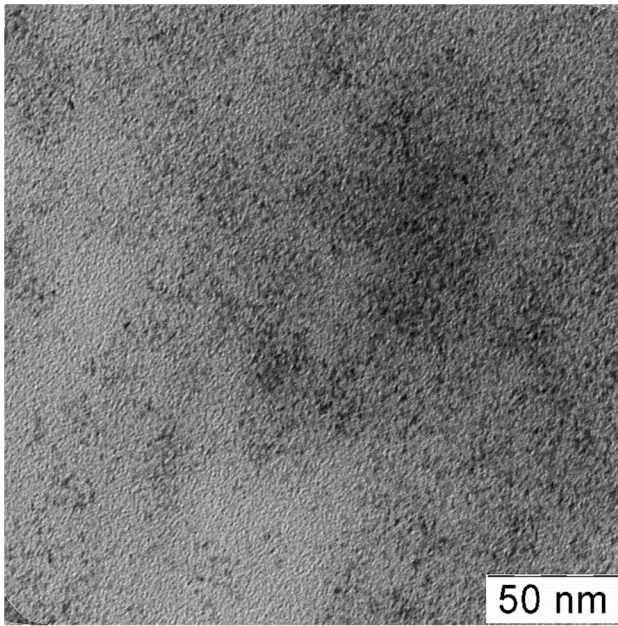

b)

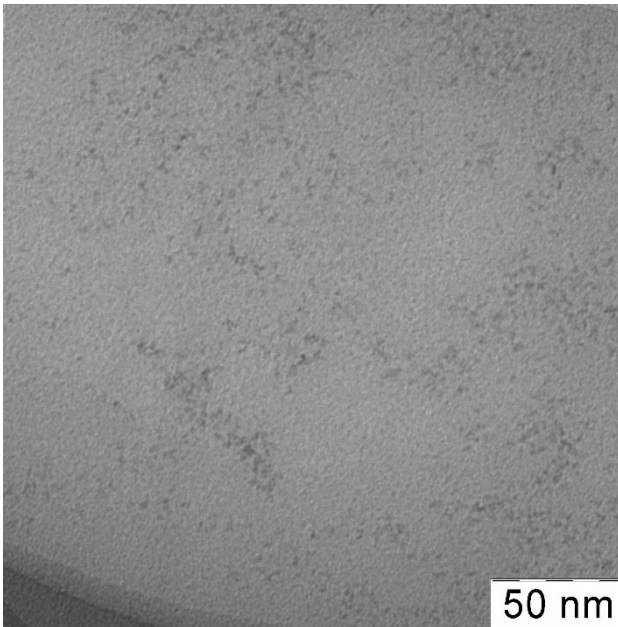

c)

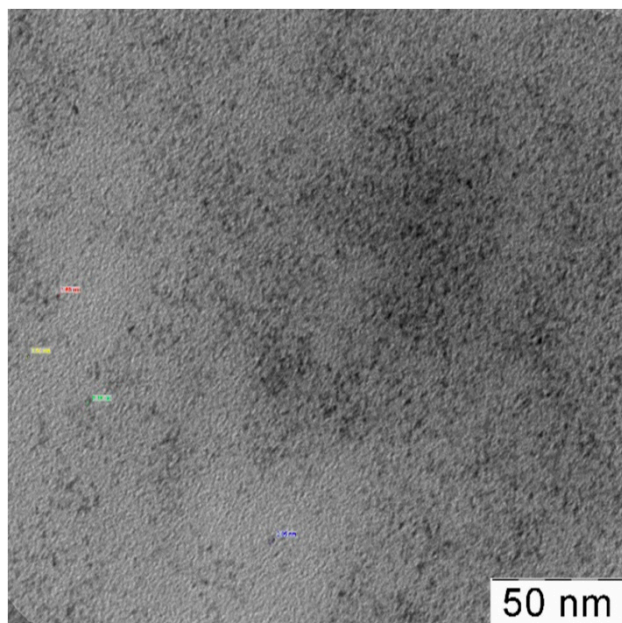

d)

**Figure S2.** TEM-images of nanoceria-containing composites of CMC with 7.1 wt.%  $\text{Ce}^{4+}$  (a); 9.0 wt.%  $\text{Ce}^{4+}$  (b); 11.0 wt.%  $\text{Ce}^{4+}$  (c); 14.1 wt.%  $\text{Ce}^{4+}$  (d);
